# Supplementary material
Source: Springer Nature journal article supplement (https://www.springermedizin.de/resource/supplementary/12885_2012_3384_MOESM8_ESM.pdf/9463626)

# Melanoma cell

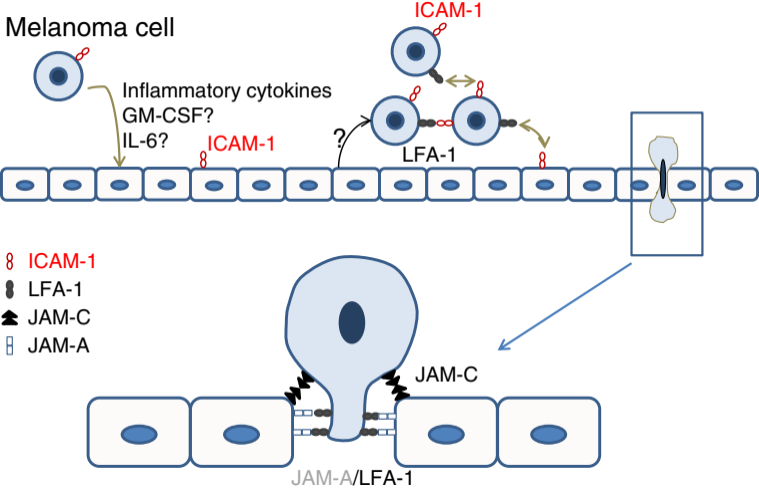

Supplement: MOESM8 [file 9463626]
